# Supplementary material for: HCMMD: systematic evaluation of metabolites in body fluids as liquid biopsy biomarker for human cancers
Source: Aging (Albany NY). 2024 Apr 26;16(8):7487–504. doi: 10.18632/aging.205779 (PMC11087094; doi:10.18632/aging.205779)
Supplement: Supplementary Figures [file aging-16-205779-s001.pdf]

SUPPLEMENTARY FIGURES

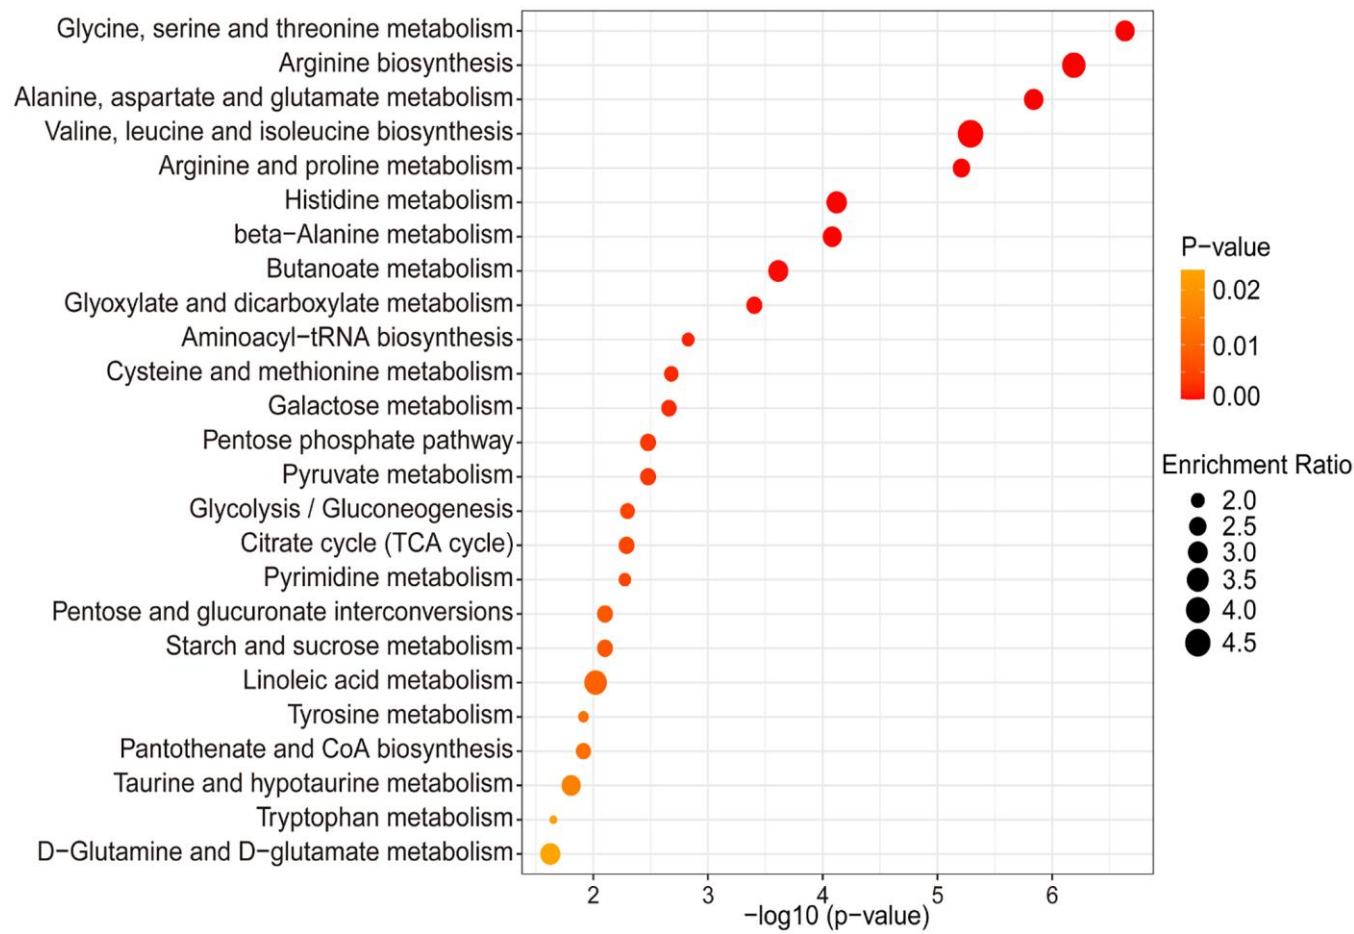

Supplementary Figure 1. Top 25 metabolic pathways for diagnostic metabolite enrichment analysis in digestive system tumors.

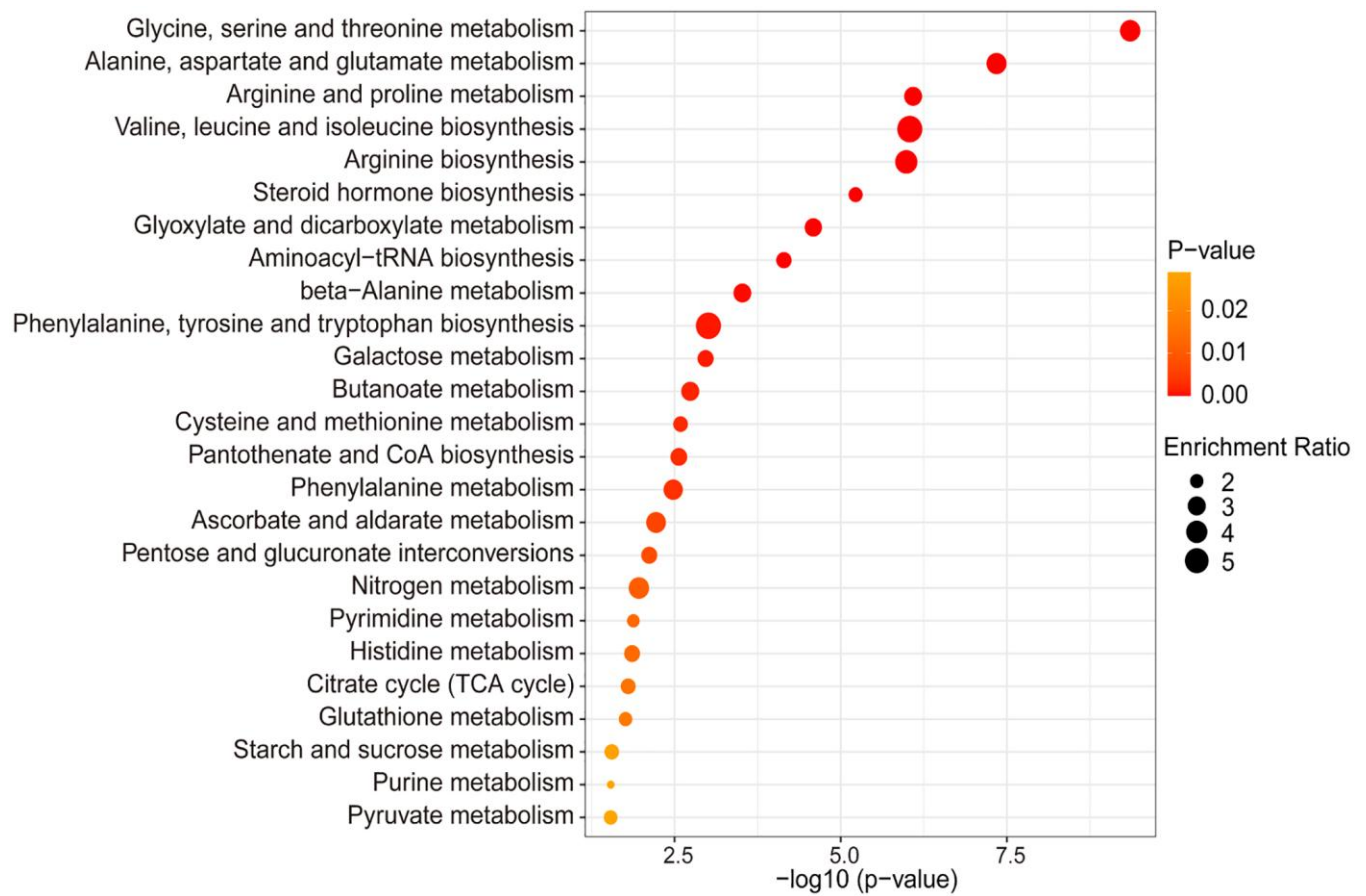

**Supplementary Figure 2. Top 25 metabolic pathways for diagnostic metabolite enrichment analysis in reproductive system tumors.**

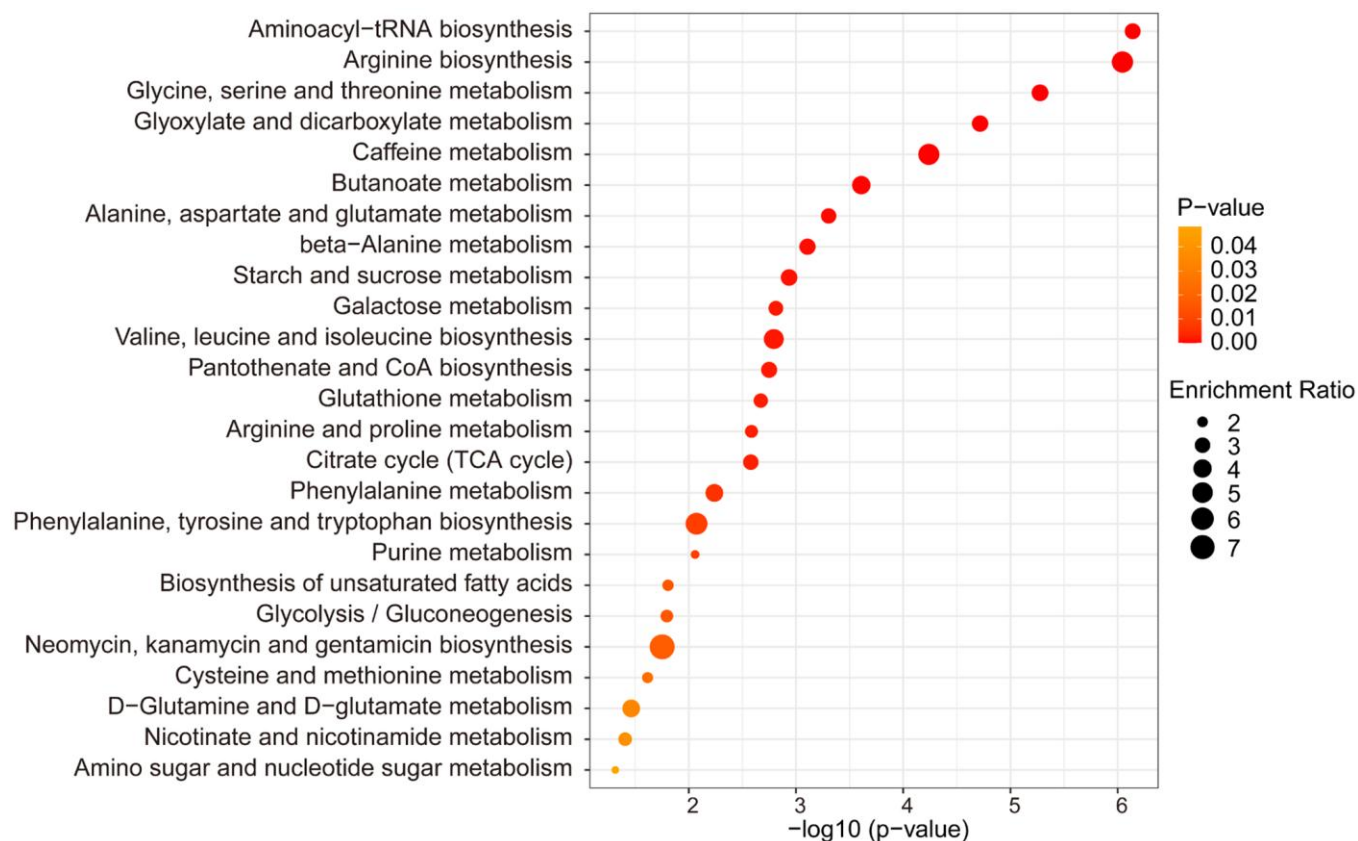

**Supplementary Figure 3. Top 25 metabolic pathways for diagnostic metabolite enrichment analysis in respiratory system tumors.**

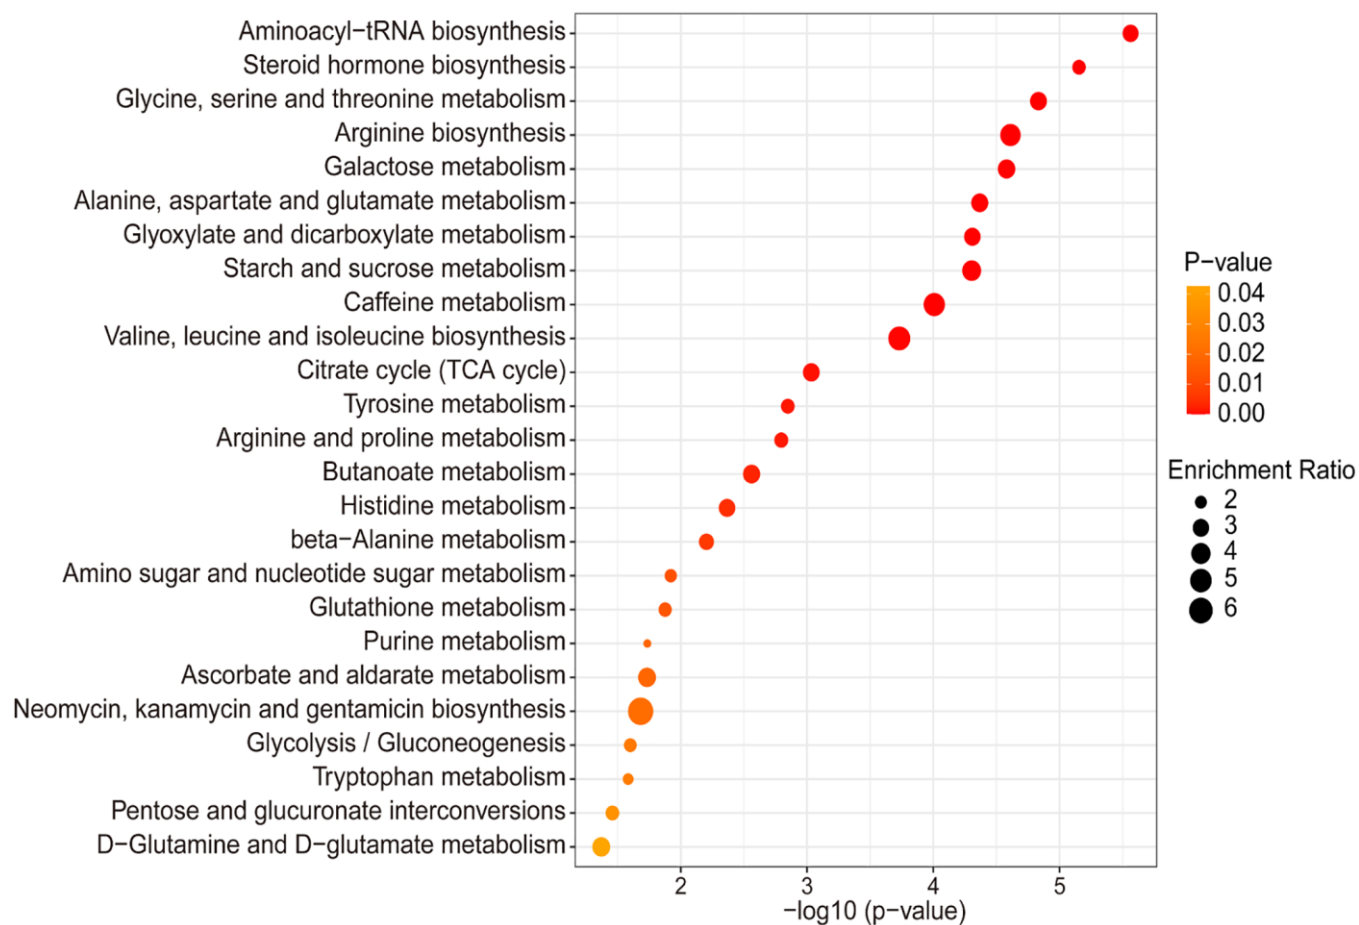

**Supplementary Figure 4. Top 25 metabolic pathways for diagnostic metabolite enrichment analysis in urinary system tumors**

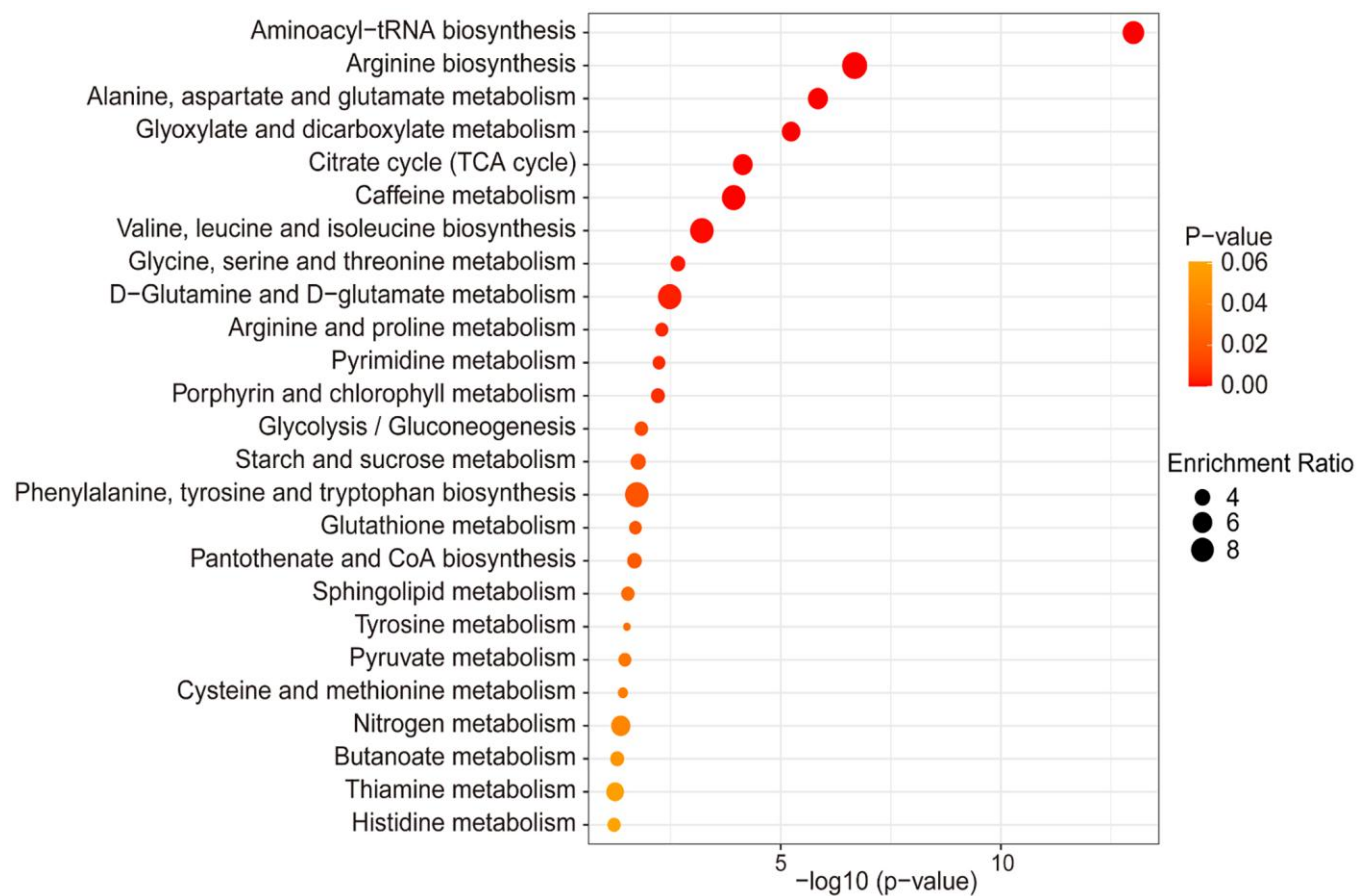

**Supplementary Figure 5. Top 25 metabolic pathways for diagnostic metabolite enrichment analysis in nervous system tumors.**
